# Supplementary material
Source: PubMed Central journal article supplement (PMC3536070)
Supplement: AEM.02667-12_zam999103995so1.pdf [file AEM.02667-12_zam999103995so1.pdf]

# Engineering Signal Peptide for Enhanced Protein Secretion in *Lactococcus lactis*

Daphne T.W. Ng<sup>a</sup> and Casim A. Sarkar<sup>a, b</sup>

Department of Bioengineering, University of Pennsylvania, Philadelphia, PA 19104, USA<sup>a</sup>;

Department of Chemical and Biomolecular Engineering, University of Pennsylvania, Philadelphia, PA 19104, USA<sup>b</sup>

## Supplementary Methods

### Mathematical model

We developed a mathematical model to quantitatively explain the differences in secretion due to silent mutations in the signal peptide. The model relates the stability of mRNA secondary structure around the ribosome binding site to translation and secretion efficiencies based on a previous model with modifications (1). Nomenclature and parameter values are provided in Table S1.

First, we modeled translation as a process initiated by a ribosome recognizing the ribosome binding site and unfolding of the initiation region in the mRNA (2, 3). The folding/unfolding equilibrium of mRNA is based specifically on the free energy of mRNA secondary structure around the ribosome binding site (RBS) ( $\Delta G_{\text{RBS}}$ ).

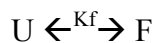

where  $K_f = [F]/[U]$  and  $\Delta G_{\text{RBS}} = -RT \ln(K_f)$  (S1)

The 30S subunit of the ribosome binds to the unfolded mRNA with association constant  $K_{rb}$ .

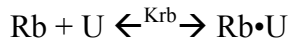

where  $K_{rb} = [Rb \cdot U]/[Rb][U]$  and  $\Delta G_{rb} = -RT \ln(K_{rb})$  (S2)

Since initiation is the rate-limiting step in translation (4), translation was set to be proportional to the amount of ribosome-bound mRNA ( $[Rb \cdot U]$ ). Finally, since *L. lactis* only secretes a fraction of the expressed protein (5), secretion rate was calculated as a fraction of the total amount of protein translated:

$$\text{secretion} \propto \text{protein expression} \propto [Rb \cdot U]$$

so,  $\text{secretion} = C [Rb \cdot U]/Rb_{tot}$  (S3)

where C is a constant that is unique to the amino acid sequence of a specific signal peptide.

Together with the two mass balance equations:

$$[U] + [F] + [Rb \cdot U] = RNA_{tot}$$
 (S4)

and  $[Rb] + [Rb \cdot U] = Rb_{tot}$ , (S5)

the system of equations, (S1), (S2), (S4) and (S5), was solved in Matlab using *fsolve* to obtain the unknowns  $[U]$ ,  $[F]$ ,  $[Rb]$ , and  $[Rb \cdot U]$ . The C values for the Usp45sp and Usp45TM8 silent mutation libraries were determined experimentally from the secretion levels of wild-type Usp45sp and Usp45TM8, respectively, and Equation S3 was used to calculate the final normalized protein secretion.

## Supplementary Tables

**Table S1.** Nomenclature and parameter values used in the mathematical model.

| Symbol           | Description                                                                                   | Value                                                                                            | Reference |
|------------------|-----------------------------------------------------------------------------------------------|--------------------------------------------------------------------------------------------------|-----------|
| F                | mRNA with secondary structure around the RBS (folded)                                         | Calculated from <i>fsolve</i>                                                                    | N/A       |
| U                | mRNA with exposed RBS (unfolded)                                                              | Calculated from <i>fsolve</i>                                                                    | N/A       |
| Rb               | Free ribosomes                                                                                | Calculated from <i>fsolve</i>                                                                    | N/A       |
| Rb•U             | Ribosomes bound to unfolded mRNA                                                              | Calculated from <i>fsolve</i>                                                                    | N/A       |
| $K_f$            | Equilibrium association constant for mRNA folding around the RBS                              | Calculated from $\Delta G_f$                                                                     | (6, 7)    |
| $\Delta G_{RBS}$ | Free energy of mRNA secondary structure around the RBS                                        | Varies from -8.5 to -0.5 kcal/mol (calculated from <i>mfold</i> with initiation term)            | (6, 7)    |
| $K_{rb}$         | Equilibrium association constant for binding of 30S ribosomal subunit to unfolded mRNA        | Calculated from $\Delta G_{rb}$                                                                  | (1)       |
| $\Delta G_{rb}$  | Free energy of binding of 30S ribosomal subunit to unfolded mRNA                              | -14 kcal/mol                                                                                     | (1)       |
| $Rb_{tot}$       | Total concentration of ribosomes in the cell                                                  | 40 $\mu$ M (assumed to be equivalent to <i>E. coli</i> with the same doubling time)              | (8, 9)    |
| $RNA_{tot}$      | Total concentration of mRNA transcripts (depending of induction level)                        | 0.08 $Rb_{tot}$ , 0.8 $Rb_{tot}$ , and 8 $Rb_{tot}$ for 0.1, 1, and 10 ng/ml nisin, respectively | This work |
| C                | Peptide-specific proportionality constant relating protein expression to secretion efficiency | Usp45SM: 1.01;<br>Usp45TM8_SM: 1.45                                                              | This work |
| R                | Gas constant                                                                                  | 1.986 cal/K mol                                                                                  | N/A       |
| T                | Temperature (in Kelvin)                                                                       | 303.15 K ( <i>L. lactis</i> was grown at 30°C)                                                   | N/A       |

**Table S2.** Bacterial strains and plasmids used in this study.

|                           | Characteristics                                                                                                                                                                                                   | Sources   |
|---------------------------|-------------------------------------------------------------------------------------------------------------------------------------------------------------------------------------------------------------------|-----------|
| <u>Strains</u>            |                                                                                                                                                                                                                   |           |
| <i>E. coli</i> EC1000     | RepA <sup>+</sup> MC1000, Km <sup>r</sup> , carrying a single copy of the pWV01 <i>repA</i> gene in <i>glgB</i>                                                                                                   | (10)      |
| <i>L. lactis</i> NZ9000   | <i>L. lactis</i> MG1353 ( <i>nisRK</i> genes on the chromosome)                                                                                                                                                   | (11)      |
| <u>Plasmids</u>           |                                                                                                                                                                                                                   |           |
| pNZ8048m:usp45sp-SCI57his | Modified pNZ8048 containing <i>PnisA</i> promoter with Usp45sp fused with downstream RGS-His-tagged <i>SCI-57</i> gene; Cm <sup>r</sup>                                                                           | (9)       |
| pNZ8048m:usp45sp-MazF     | Modified pNZ8048 containing <i>PnisA</i> promoter with Usp45sp fused with downstream RGS-His-tagged <i>E. coli MazF</i> gene; Cm <sup>r</sup>                                                                     | This work |
| pNZ8048m:usp45sp-Nuc      | Modified pNZ8048 containing <i>PnisA</i> promoter with Usp45sp fused with downstream RGS-His-tagged <i>S. aureus</i> nuclease gene; Cm <sup>r</sup>                                                               | This work |
| pNZ8048m:usp45sp-AmyE     | Modified pNZ8048 containing <i>PnisA</i> promoter with Usp45sp fused with downstream RGS-His-tagged <i>B. subtilis</i> $\alpha$ -amylase gene (with internal EcoRI silent mutation); Cm <sup>r</sup>              | This work |
| pNZ8048m:SP310-Nuc        | Modified pNZ8048 containing <i>PnisA</i> promoter with SP310 signal peptide fused with downstream RGS-His-tagged <i>S. aureus</i> nuclease gene; Cm <sup>r</sup>                                                  | This work |
| pNZ8048m:SP310-AmyE       | Modified pNZ8048 containing <i>PnisA</i> promoter with SP310 signal peptide fused with downstream RGS-His-tagged <i>B. subtilis</i> $\alpha$ -amylase gene (with internal EcoRI silent mutation); Cm <sup>r</sup> | This work |

**Table S3.** Primers used in this study.

| Primer Number | Primer Name               | Nucleotide Sequence (5' → 3') <sup>a</sup>                                                                                              |
|---------------|---------------------------|-----------------------------------------------------------------------------------------------------------------------------------------|
| 1             | MazF_BspEI_f              | CTTACG <u>TCCGGAG</u> TTTACGCTATGGTAAGCCGATACGTAC                                                                                       |
| 2             | MazF_BamHI_r              | TACGTT <u>GGATCCT</u> CTCCCAATCAGTACGTTAATTTTG                                                                                          |
| 3             | Usp45NcoIMazF-BspEI_f     | TTCAGCT <u>TCCGGAG</u> TTTACG <u>CCATGG</u> TAAAGCC                                                                                     |
| 4             | SaurNuc_NcoI_f            | TTTACG <u>CCATGG</u> <b>T</b> TTTACAAACAGATAATGGCGTAAATAG                                                                               |
| 5             | SaurNuc_BamHI_r           | ATGGTGGGATCCTCTTTGACCTGAATCAGCGTTGTCTTC                                                                                                 |
| 6             | BsubAmy_NcoI_f            | TTTACG <u>CCATGG</u> TTCTTACAGCACCGTCGATCAAAAG                                                                                          |
| 7             | BsubAmy_BamHI_r           | ATGGTGGGATCCTCTATGGGGAAGAGAACCGCTTAAGC                                                                                                  |
| 8             | BsubAmy_EcoRImut_f        | CACGCAGAACTCATTGCTCG                                                                                                                    |
| 9             | BsubAmy_EcoRImut_r        | CGAGCAATGAGTTCTGCGTG                                                                                                                    |
| 10            | SP310_EcoRI_f             | CTCAAAGAATTCATGAAATTTAATAAAAAAAGAGTTGCAATAG                                                                                             |
| 11            | SP310_NcoI_r              | TTGTGC <u>CCATGG</u> CATTAGTTTGGTTATCTTGGATTGATG                                                                                        |
| 12            | pNZ_EcoRI_f               | TTATAAGGAGGCACTCAAAGAATTCATG                                                                                                            |
| 13            | NucB_NcoI_r               | CATTATCTGTTTGTGAA <u>ACCATGG</u>                                                                                                        |
| 14            | Usp45SM_NcoI_r            | CACTTTCCATGGCRTANACNCCNGAYAANGNGCNGCNGCNGAN<br>AGDATNACNGTNGACATYAADATNGCNGADATDATYTTYTTYTT<br>CATGAATTCCTTTGAGTGCCTCCTTATAA            |
| 15            | Usp45TM_NcoI_r            | ATCGGCTTACCATGGCMNNAACMNNGGAMNNCGGGGCTGCMNNM<br>NNAAGMNNCACMNNMNNMNNTAAMNNAGCMNNMNNMNNCTTTTT<br>TTTCATGAATTCCTTTGAGTGCCTCCTTATAA        |
| 16            | TM8SM_NcoI_r <sup>b</sup> | GTGAAACCATGGCYTTNACR'TTNGADATNGGNGCNGCNGTNGTN<br>AGCATNACNACNACNGC <b>N</b> AARTGNGCYTTNAGNACYTTYTTYTT<br>CATGAATTCCTTTGAGTGCCTCCTTATAA |

<sup>a</sup> Restriction sites are underlined.

<sup>b</sup> The bolded N should be a Y to encode for only silent mutations of leucine. Nevertheless, all clones selected for characterization in this work contained only silent mutations at this position.

**Table S4.** Nucleotide sequences of selected clones from the Usp45sp silent mutation library.

| <b>Usp45sp silent mutation clone</b> | <b>Nucleotide sequence (5' → 3')</b>                                                    |
|--------------------------------------|-----------------------------------------------------------------------------------------|
| Usp45sp                              | ATGAAAAAAAAAGATTATCTCAGCTATTTTAATGTCTACAGTGATACTTTCTGCTGC<br>AGCCCCGTTGTCCGGAGTTTACGCC  |
| Usp45SM2                             | ATGAAGAAAAAGATCATATCCGCCATCTTGATGTCAACAGTCATTCTATCGGCCGC<br>CGCCCCCTTATCAGGCGTGTATGCC   |
| Usp45SM3                             | ATGAAGAAGAAGATCATTTCTGCCATTTTGATGTCAACAGTTATTCTTTCCGCAGC<br>CGCTCCGTTATCCGGAGTGTACGCC   |
| Usp45SM4                             | ATGAAGAAGAAAATCATTTCTCAGCGATATTAATGTCCACGGTCATCCTTTCTGCGGC<br>CGCTCCGTTGTCTGGTGTCTACGCC |
| Usp45SM5                             | ATGAAGAAGAAAATCATCTCAGCCATATTAATGTCCACAGTGATCCTCTCCGCGGC<br>AGCGCCATTGTCCGGCGTGTACGCC   |
| Usp45SM6                             | ATGAAGAAGAAGATCATCTCCGCCATATTAATGTCCACTGTGATACTGTGAGCAGC<br>TGCGCCGTTGTGAGGTGTATATGCC   |
| Usp45SM7                             | ATGAAAAAAAAAATCATTTCTCAGCCATCTTGATGTCCACAGTTATCCTCTCAGCAGC<br>AGCTCCCTTATCGGGAGTTTACGCC |
| Usp45SM8                             | ATGAAGAAGAAGATCATATCCGCGATCTTGATGTGACAGTAATACTTTCCGCCGC<br>GGCGCCGTTATCGGGGGTATATGCC    |
| Usp45SM9                             | ATGAAAAGAAGATCATCTCTGCCATATTAATGTCCACCGTAATCCTCTCCGCCGC<br>CGCGCCCTTATCCGGAGTCTACGCC    |
| Usp45SM10                            | ATGAAAAGAAGATCATCTCAGCCATTTTGATGTCTACGGTTATTCTTTCTGCAGC<br>AGCTCCATTGTCCGGCGTATACGCC    |
| Usp45SM11                            | ATGAAGAAGAAAATCATCTCCGCAATATTAATGTCCACCGTGATACTATCTGCAGC<br>TGCCCCGTTATCTGGAGTGTACGCC   |
| Usp45SM12                            | ATGAAGAAGAAAATAATTTCCGCGATCTTAATGTCAACAGTGATCCTATCGGCAGC<br>GGCGCCATTATCAGGAGTGTACGCC   |
| Usp45SM14                            | ATGAAAAGAAGATCATATCCGCCATCTTGATGTCTACAGTAATCCTTTCCGCGGC<br>CGCCCCCTTATCAGGTGTGTATGCC    |
| Usp45SM15                            | ATGAAGAAAAAGATCATCTCCGCAATTTTGATGTGACAGTCATCCTCTCGGCTGC<br>AGCACCTTTGTCCGGAGTCTACGCC    |
| Usp45SM16                            | ATGAAGAAGAAGATAATATCCGCCATCTTAATGTGACCGTGATACTTTCCGGCAGC<br>TGCTCCTTTATCGGGAGTATATGCC   |
| Usp45SM19                            | ATGAAAAAAAAAATCATCTCTGCCATCTTAATGTCAACGGTTATTCTCTCCGCCGC                                |

---

TGCGCCTTTATCAGGGGTTTATGCC

Usp45SM20

ATGAAAAGAAGATCATTTCGGCGATATTGATGTCCACCGTCATTCTATCCGCGGC  
TGCACCTTTGTCCGGGGTATACGCC

---

**Table S5.** Nucleotide sequences of selected clones from the Usp45sp targeted mutation library.

| <b>Usp45sp targeted mutation clone</b> | <b>Nucleotide sequence (5' → 3')</b>                                                   |
|----------------------------------------|----------------------------------------------------------------------------------------|
| Usp45sp                                | ATGAAAAAAAAAGATTATCTCAGCTATTTTAATGTCTACAGTGATACTTTCTGCTGC<br>AGCCCCGTTGTCCGGAGTTTACGCC |
| Usp45TM6                               | ATGAAAAAAAAAGCTTGTTACTGCTCAGTTATATGGGAGTGTGATTCTTCTGTCTGC<br>AGCCCCGTATTCCTGTGTTAATGCC |
| Usp45TM7                               | ATGAAAAAAAAAGAGTTGTACGGCTGGTTTACAGTTGATGGTGACGCTTTTGACTGC<br>AGCCCCGTTTTCTATGTTAATGCC  |
| Usp45TM8                               | ATGAAAAAAAAAGGTGCTGAAGGCTCATTTAGCTGTGGTTGTGATGCTTACGACGGC<br>AGCCCCGATTTCCAATGTTAAGGCC |
| Usp45TM11                              | ATGAAAAAAAAAGCCGAGGCGGGCTTTGTTATGTATGCTTGTGGGTCTTGCTCTGGC<br>AGCCCCGATGTCCAATGTTACGGCC |
| Usp45TM12                              | ATGAAAAAAAAAGCGCGGATGGCTTGGTTACGTATGATGGTGGCTCTTGGGGTTGC<br>AGCCCCGCCTTCCGATGTTCTTGCC  |
| Usp45TM13                              | ATGAAAAAAAAAGCGTGCCTGCTTTGTTAAAGCTGACTGTGCTGCTTACTACGGC<br>AGCCCCGTGGTCCGTGGTTGGGGCC   |
| Usp45TM14                              | ATGAAAAAAAAAGTCGGCGCTGCTGCTTTAATGCTTTCTGTGAATCTTTTTTTGGC<br>AGCCCCGGCGTCCAATGTTAATGCC  |
| Usp45TM28                              | ATGAAAAAAAAAGCCGTCGAGTGTGTTATTGTGTTGTGTGATGCTTGGTATTGC<br>AGCCCCGTGTTCTTTGTTATGGCC     |
| Usp45TM29                              | ATGAAAAAAAAAGCCGTGTACTGCTCTTTTACTTTGGGGTGTGGCTCTTGCGATTGC<br>AGCCCCGAAGTCTTTGTTTCATGCC |



**Table S6.** Nucleotide sequences of selected clones from the Usp45TM8 silent mutation library.

| <b>Usp45TM8 silent mutation clone</b> | <b>Nucleotide sequence (5' → 3')</b>                                                     |
|---------------------------------------|------------------------------------------------------------------------------------------|
| Usp45TM8                              | ATGAAAAAAAAAGGTGCTGAAGGCTCATTTAGCTGTGGTTGTGATGCTTACGACGG<br>CAGCCCCGATTTCCAATGTTAAGGCC   |
| Usp45TM8_SM7                          | ATGAAAAAAAAAGGTCCTTAAAGCACACTTGGCCGTGGTAGTGATGCTAACGACTG<br>CTGCCCCGATTTCTAATGTAAAAGCC   |
| Usp45TM8_SM9                          | ATGAAAAAGAAGGTGCTCAAAGCACATTTAGCTGTGGTGGTGTGATGCTTACAACCTG<br>CTGCTCCCATTTCTAACGTTAAAGCC |
| Usp45TM8_SM10                         | ATGAAAAAAAAAGGTCCTCAAGGCTCACTTGGCAGTGGTGGTAATGCTTACCACAG<br>CGCCCCCTATCTCTAATGTCAAGGCC   |
| Usp45TM8_SM14                         | ATGAAAAAGAAGGTCCTCAAGGCCCACTTGGCCGTAGTCGTTATGCTAACCCACGG<br>CTGCTCCAATATCTAACGTAAAAGCC   |
| Usp45TM8_SM15                         | ATGAAAAAGAAGGTACTCAAAGCACATTTAGCTGTTGTGCGTAATGCTCACAAACGG<br>CCGCTCCTATATCGAATGTCAAAGCC  |
| Usp45TM8_SM22                         | ATGAAAAAGAAGGTCCTTAAAGGCACATTTAGCTGTAGTCGTTATGCTAACTACGG<br>CAGCCCCAATCTCAAATGTGAAAGCC   |
| Usp45TM8_SM25                         | ATGAAAAAGAAGGTCCTCAAGGCCCACTTAGCAGTTGTTGTGATGCTCACCACAG<br>CTGCCCCCTATCTCGAATGTTAAAGCC   |

## Supplementary Figures

**Figure S1.** Standard curve of  $\alpha$ -amylase starch azure test. *B. subtilis*  $\alpha$ -amylase (100  $\mu$ l of 0.0001 mg/ml to 0.1 mg/ml solution) was mixed with 20 mg starch azure, and then 900  $\mu$ l  $\alpha$ -amylase buffer was added. Samples were shaken horizontally at 37°C for 1 hr, and absorbance of the supernatant was measured at 595 nm. The data represent the mean  $\pm$  SEM of two independent experiments.

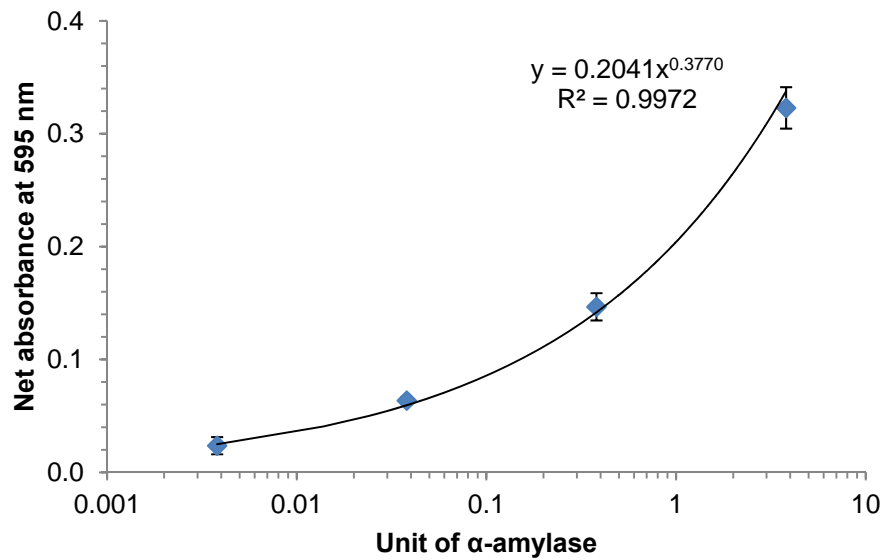

**Figure S2.** Nuclease plate test and  $\alpha$ -amylase starch azure test of the two control signal peptides, Usp45sp and SP310. (A) The size of the pink halo on Toluidine blue-DNA-agar corresponds to the activity of secreted nuclease. (B) The starch azure test gives a more quantitative measure of  $\alpha$ -amylase secretion (see Fig. S1). Blue bar: no nisin induction; red bar: 10 ng/ml nisin induction. In both cases, the secretion efficiency of Usp45sp is higher than that of SP310. In the starch azure test, SP310 secretion was ~62% of Usp45sp secretion, in agreement with previous results (12).

**A**

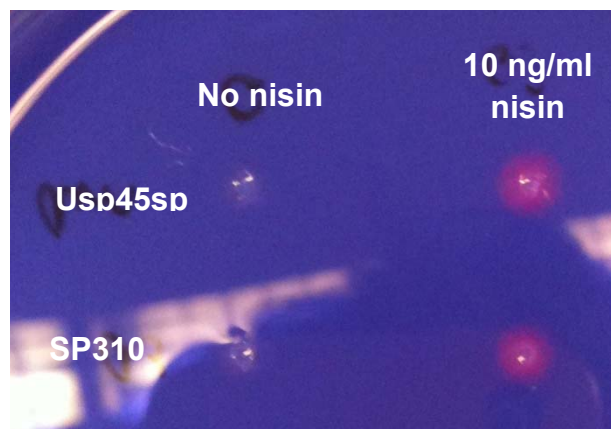

**B**

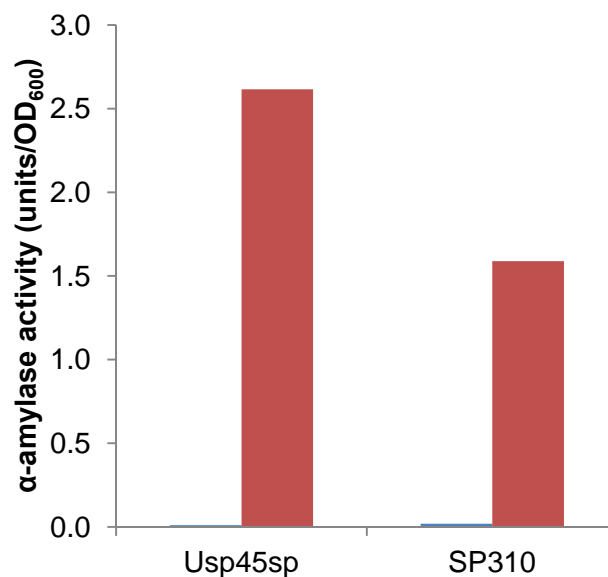

## Supplementary References

1. de Smit MH, van Duin J. 1990. Secondary structure of the ribosome binding site determines translational efficiency: A quantitative analysis. *Proc. Natl. Acad. Sci. USA* **87**:7668-7672.
2. de Smit MH, van Duin J. 1994. Control of translation by mRNA secondary structure in *Escherichia coli*: A quantitative analysis of literature data. *J. Mol. Biol.* **244**:144-150.
3. Kaminishi T, Wilson DN, Takemoto C, Harms JM, Kawazoe M, Schluenzen F, Hanawa-Suetsugu K, Shirouzu M, Fucini P, Yokoyama S. 2007. A snapshot of the 30S ribosomal subunit capturing mRNA via the Shine-Dalgarno interaction. *Structure* **15**:289-297.
4. Gualerzi CO, Pon CL. 1990. Initiation of mRNA translation in prokaryotes. *Biochemistry* **29**:5881-5889.
5. Le Loir Y, Azevedo V, Oliveira SC, Freitas DA, Miyoshi A, Bermúdez-Humarán LG, Nouaille S, Ribeiro LA, Leclercq S, Gabriel JE, Guimaraes VD, Oliveira MN, Charlier C, Gautier M, Langella P. 2005. Protein secretion in *Lactococcus lactis*: an efficient way to increase the overall heterologous protein production. *Microb. Cell Fact.* **4**:2.
6. Zuker M. 2003. Mfold web server for nucleic acid folding and hybridization prediction. *Nucleic Acids Res.* **31**:3406-3415.
7. Freier SM, Kierzek R, Jaeger JA, Sugimoto N, Caruthers MH, Neilson T, Turner DH. 1986. Improved free-energy parameters for predictions of RNA duplex stability. *Proc. Natl. Acad. Sci. USA* **83**:9373-9377.
8. Fegatella F, Lim J, Kjelleberg S, Cavicchioli R. 1998. Implications of rRNA operon copy number and ribosome content in the marine oligotrophic ultramicrobacterium *Sphingomonas* sp. strain RB2256. *Appl. Environ. Microbiol.* **64**:4433-4438.
9. Ng DTW, Sarkar CA. 2011. Nisin-inducible secretion of a biologically active single-chain insulin analog by *Lactococcus lactis* NZ9000. *Biotechnol. Bioeng.* **108**:1987-1996.
10. Leenhouts K, Buist G, Bolhuis A, ten Berge A, Kiel J, Mierau I, Dabrowska M, Venema G, Kok J. 1996. A general system for generating unlabelled gene replacements in bacterial chromosomes. *Mol. Gen. Genet.* **253**:217-224.
11. Kuipers OP, de Ruyter PGGA, Kleerebezem M, de Vos WM. 1998. Quorum sensing-controlled gene expression in lactic acid bacteria. *J. Biotechnol.* **64**:15-21.

12. Ravn P, Arnau J, Madsen SM, Vrang A, Israelsen H. 2003. Optimization of signal peptide SP310 for heterologous protein production in *Lactococcus lactis*. Microbiology **149**:2193-2201.
